1  
2  
3 **Whole-of-School Physical Activity Implementation in the Context**  
4 **of the Dubai Fitness Challenge**  
5

6 **Chris McMahon<sup>1</sup>, Collin A. Webster<sup>2\*</sup>, R. Glenn Weaver<sup>3</sup>, Christophe El Haber<sup>4</sup>, Gönül**  
7 **Tekkurşun Demir<sup>5</sup>, Zainab Mohamed Ismail<sup>4</sup>, Syeda Zoha Fatima Naqvi<sup>4</sup>, Mehnaz**  
8 **Ghani<sup>4</sup>, Şevval Kepenek<sup>4</sup>, Manel Kherraf<sup>4</sup>, Thrisha Krishnakumar<sup>4</sup>, Pranati Prakash<sup>4</sup>,**  
9 **Yeowon Seo<sup>4</sup>**

10  
11 <sup>1</sup>University of Birmingham, School of Sport, Exercise and Rehabilitation Sciences,  
12 Birmingham, UK

13 <sup>2</sup>Texas A&M University – Corpus Christi, Department of Kinesiology, Corpus Christi, TX,  
14 USA

15 <sup>3</sup>University of South Carolina, School of Public Health, Columbia, SC, USA

16 <sup>4</sup>University of Birmingham Dubai, School of Psychology, Dubai, UAE

17 <sup>5</sup>Gazi University, Faculty of Sport Sciences, Ankara, Turkey

18  
19 **\* Correspondence:**

20 Collin A. Webster, Ph.D.

21 [collin.webster@tamucc.edu](mailto:collin.webster@tamucc.edu)  
22  
23

## WHOLE-OF-SCHOOL PHYSICAL ACTIVITY

### 24 **Abstract**

25 **Introduction.** Physical activity (PA) promotion among school-aged youth is a global health  
26 priority. Recommendations for such promotion include implementing whole-of-school  
27 approaches that maximize resources across the school environment. This study examined  
28 schools' participation in an annual, government-led, and emirate-wide initiative in Dubai,  
29 called the Dubai Fitness Challenge, in which the goal is to accrue 30 minutes of PA every day  
30 for 30 days (as such, the initiative is colloquially referred to as "Dubai 30x30"). **Methods.** A  
31 mixed-methods design was employed for this study. Three schools were recruited using  
32 convenience sampling. Participants were 18 physical education teachers, 20 classroom  
33 teachers, 2 principals and 45 students. Data sources included surveys, focus groups, and  
34 interviews. Data were analyzed using descriptive statistics, multinomial logistic regression,  
35 and open and axial coding to develop themes. **Results.** School staff reported that most Dubai  
36 30x30 activities were provided in physical education, at break times during school, and  
37 before and after school. Students reported that they mainly participated in Dubai 30x30  
38 activities during physical education and occasionally participated in activities after school  
39 and on weekends. During school, students were more likely to reach higher PA intensity  
40 levels when they were in contexts other than the regular classroom setting. Among school  
41 staff, physical education teachers were most involved and classroom teachers were least  
42 involved in promoting Dubai 30x30. Parent engagement was high. Staff perceived that Dubai  
43 30x30 brought the community together, but physical education teachers also indicated there  
44 was a lack of implementation guidance and they felt burdened. Participants believed Dubai  
45 30x30 increased PA participation and helped to promote their schools. **Discussion:** This  
46 study provides an initial glimpse into schools' participation in Dubai 30x30 and suggests that  
47 a whole-of-school PA lens is useful in gleaning information that could help to increase and  
48 optimize PA opportunities for students.

## WHOLE-OF-SCHOOL PHYSICAL ACTIVITY

49            **Keywords:** comprehensive school physical activity, physical education, classroom

50    physical activity, recess, teacher, principal, child, adolescent

51

52

53

54

55

56

57

58

59

60

61

62

63

64

65

66

67

68

69

70

71

72

73

74

## Introduction

75 Physical activity (PA) benefits children and adolescents by supporting their physical,  
76 mental, social, and emotional development (Chaput et al., 2020). The World Health  
77 Organization (WHO) recommends that school-age youth engage in at least 60 minutes of  
78 moderate-to-vigorous intensity PA each day (WHO, 2020). This PA should be mostly aerobic  
79 and should include activities that strengthen muscles and bones at least three days per week  
80 (WHO 2020). Unfortunately, 81% of adolescents do not meet PA guidelines (Guthold et al.,  
81 2020). As physical inactivity can track from adolescence into young adulthood (Hayes et al.,  
82 2019; Telama, 2009), early intervention during the school years should be a priority for  
83 addressing insufficient PA levels in youth and promoting active living.

84 Given their extensive reach and existing resources, schools provide an attractive setting  
85 for supporting children and adolescents' PA needs. Recommendations stress the importance  
86 of taking a "whole-of-school approach" to PA promotion (Global Advocacy for Physical  
87 Activity, 2012; Institute of Medicine [IOM], 2013; Milton et al., 2021). Such an approach  
88 may look different from one school to the next but the general idea is to maximize PA  
89 opportunities and participation by using as many resources as possible before, during and  
90 after school. For example, the comprehensive school physical activity program (CSPAP)  
91 framework, which is the national framework for school-based physical education and PA in  
92 the United States, identifies five components that can be used synergistically to help ensure  
93 all school-aged youth meet the PA guidelines and develop the competence and confidence to  
94 lead physically active lives (Centers for Disease Control and Prevention, 2019). These  
95 components include (a) quality physical education, (b) PA during school, (c) PA before and  
96 after school, (d) staff involvement and (e) family and community engagement. A quality  
97 physical education program should serve a foundational role in a CSPAP by providing  
98 students with the knowledge and skills to pursue a physically active lifestyle. Other PA

## WHOLE-OF-SCHOOL PHYSICAL ACTIVITY

99 opportunities during school (e.g., recess and other break times, PA integrated with classroom  
100 time), as well as PA opportunities before and after school (e.g., clubs, active transportation),  
101 can allow students to apply and extend what they learn in physical education. The staff  
102 involvement and family and community engagement components focus on recruiting the  
103 support of as many other people as possible (e.g., all teachers, school administrators, parents,  
104 community partners) to assist with PA promotion.

105 Evidence suggests that a whole-of-school approach to PA promotion leads to positive  
106 outcomes for school-age youth (Belton et al., 2020; Colabianchi et al., 2015; Katewongsa et  
107 al., 2022; Pulling Kuhn et al., 2021). For example, Pulling Kuhn et al. (2021) conducted a  
108 systematic review of multicomponent school-based PA interventions and found that reported  
109 outcomes included increased time spent in PA, increased physical fitness, improved motor  
110 skills, improved weight status, improved blood pressure, improved on-task behavior and  
111 improved performance in reading and math. However, surveys conducted in the U.S. indicate  
112 whole-of-school PA programs exist in only 16% of elementary schools and 1-7% of  
113 secondary schools (American Alliance for Health, Physical Education, Recreation and Dance  
114 [AAHPERD], 2011; Brener et al., 2017; Colabianchi et al., 2015). In Ireland, a national  
115 initiative with primary (elementary) schools called Active School Flag has had more success  
116 with 85% of schools engaging at some level with the initiative and 46% of schools earning at  
117 least one flag (i.e., meeting criteria to be named an “active school”).

118 The varying uptake of whole-of-school PA underscores the importance of examining  
119 schools’ implementation of current initiatives. Carson et al. (2014) proposed a conceptual  
120 framework for research and practice related to whole-of-school PA, which is based on  
121 ecological systems theory (Bronfenbrenner, 1992; McLeroy et al., 1988). The framework is  
122 organized into multiple levels of influence on the implementation of a whole-of-school PA  
123 initiative and, ultimately, on youth PA. Specific to implementation, the most proximal level

## WHOLE-OF-SCHOOL PHYSICAL ACTIVITY

124 of influence is the Meso level. This level consists of implementation facilitators, including  
125 the knowledge, skills, and dispositions of the implementers (e.g., school personnel), as well  
126 as resources (e.g., school facilities, equipment, time, and space allocation) and safety  
127 (physical, social, and emotional) regarding PA opportunities. Above the Meso level is the  
128 Exo level, which comprises the leaders of whole-of-school PA initiatives: a champion  
129 (someone who spearheads the initiative), the school administrative team (i.e., their support  
130 for the initiative) and a school committee dedicated to the initiative. Finally, the Macro level  
131 incorporates cultural elements of the school in relation to PA promotion. These elements  
132 include policy (e.g., PA-related legislation, monitoring and evaluation of the initiative) and  
133 normative behaviors and beliefs (e.g., shared expectations and values of members of the  
134 school community).

135 Research on whole-of-school PA implementation has identified numerous factors that  
136 align with all levels of influence in Carson et al.'s (2014) conceptual framework. These  
137 factors include public policies (e.g., state mandates related to whole-of-school PA; Phelps et  
138 al., 2018), school culture (e.g., prioritizing PA amid the pressures of academic testing, PA  
139 role-modelling by school staff, celebrating PA participation; Cassar et al., 2022; Ní Chróinín  
140 & McMullen; 2020), program leadership (e.g., a person who champions the initiative;  
141 McMullen et al., 2022), administrative support (e.g., providing teachers with PA promotion  
142 resources, allowing for teacher autonomy in program implementation, administrators role-  
143 modelling PA; Cassar et al., 2022; Phelps et al., 2018), facilities (e.g., physical education  
144 facilities, bike racks that support active commuting), (Phelps et al., 2018), knowledge and  
145 beliefs related to PA promotion (Cassar et al., 2022) and the availability of many PA  
146 opportunities (McMullen et al., 2022). Such research is critical to informing ongoing and  
147 future efforts to maximize the implementation of whole-of-school PA initiatives.

## WHOLE-OF-SCHOOL PHYSICAL ACTIVITY

148 In parallel with global trends, 81% of children and adolescents in the United Arab  
149 Emirates are not accumulating at least 60 minutes of moderate-to-vigorous PA each day  
150 (Alrahma et al., 2023). One initiative that may help to address this issue is the Dubai Fitness  
151 Challenge. Since 2017, the Dubai government has implemented the Dubai Fitness Challenge  
152 (also referred to as Dubai 30x30) annually with the goal of engaging Dubai residents in 30  
153 minutes of fitness activities for 30 days (late October through late November). Numerous  
154 activities are organized throughout the month, such as a half marathon, a bicycle ride, sports  
155 competitions, video workouts and free fitness classes. According to the Khaleej Times (citing  
156 data from Dubai's Department of Economy and Tourism) there were 786,000 participants in  
157 the first year of the event's implementation and 1.6 million participants in 2021 (close to half  
158 of Dubai's total population) and 88% of those who participated in 2021 reached the 30/30  
159 goal.

160 Though not a requirement, Dubai schools are strongly encouraged to participate in  
161 Dubai 30x30. Some media attention has been given to reporting various kinds of activities  
162 that schools implement during the initiative and the benefits of the initiative according to  
163 physical education teachers ("Dubai Fitness Challenge", 2022; Roberts, 2022; "Schools Get  
164 Moving", 2022). Examples of activities include partnering with community  
165 organizations/companies to offer different sports, games, and fitness events, taking field trips  
166 (e.g., to the beach) to exercise, having students use activity passports or scorecards to  
167 incentivize participation, and engaging school staff and parents in activity participation.  
168 Reported benefits include students wanting to continue doing activities they were introduced  
169 to throughout the month and parents' enjoying participation in the initiative. Despite these  
170 media portrayals of Dubai 30x30 implementation in schools, there is a lack of research that  
171 examines such implementation. No studies have investigated schools' implementation of the  
172 initiative from the perspective of whole-of-school PA promotion, which is essential for

## WHOLE-OF-SCHOOL PHYSICAL ACTIVITY

173 helping school leaders (e.g., government officials who oversee the education sector in Dubai,  
174 school administrators) optimize Dubai 30x30 implementation using available school and  
175 community resources. The purpose of this study, therefore, was to examine schools'  
176 implementation of Dubai 30x30 through a whole-of-school PA lens. As this was the first  
177 study to investigate schools' implementation of Dubai 30x30, we opted to approach the study  
178 in a broad and exploratory manner by asking the following research questions: (a) What was  
179 the extent and nature of Dubai 30x30 activities for students, staff, and families before, during  
180 and after school? (b) To what extent did students participate in Dubai 30x30 activities? (c)  
181 How did students' PA levels during school relate to contextual variables? (d) To what extent  
182 and in what ways were staff, families and community partners involved/engaged in  
183 promoting Dubai 30x30? (e) What were the perceived successes and challenges involved  
184 with implementing the initiative? and (f) What was the perceived impact of implementing the  
185 initiative on students, staff, families, and the community?

### 186 **Materials and Methods**

#### 187 **Research Design**

188 This descriptive study was conducted using a convergent parallel mixed-methods  
189 research design (Edmonds & Kennedy, 2017). Specifically, quantitative and qualitative data  
190 were collected concurrently and analyzed jointly to address the research questions.

#### 191 **Participants and Setting**

192 Convenience sampling was used to recruit three private international schools in Dubai  
193 to participate in the study. Each school follows a British curriculum. The first school (School  
194 1) serves students ages 3-11 and the second and third schools (School 2 and School 3) serve  
195 students ages 3-18. School 1 opened in 1989, School 2 opened in 2015 and School 3 opened  
196 in 2021. At the time of this study, more information was available for Schools 1 and 2 than  
197 for School 3 because the first two schools had undergone government inspections and reports



## WHOLE-OF-SCHOOL PHYSICAL ACTIVITY

198 of the inspection results were publicly available online, whereas the third school had not yet  
199 been inspected. School 1 had a total enrollment of 1177 students and a teacher-student ratio  
200 of 1:15. School 2 had a total enrollment of 1020 students and a teacher-student ratio of 1:8.  
201 School 3 had a total enrollment of 1290 students but there was no information available about  
202 teacher-student ratio. The largest nationality group of students at School 1 was UK, while the  
203 largest nationality group of students for School 2 was European. There was no information  
204 available about students' nationalities for School 3. For the 2022-2023 school year, the Dubai  
205 government rated School 1 as "outstanding" and School 2 as "very good." These ratings  
206 encompass numerous areas of focus, such as students' achievement, personal and social  
207 development, teaching and assessment, staffing, facilities, and other resources. While School  
208 3 had not yet received a rating, our visits to the school led us to believe that the learning  
209 climate and availability of resources were similar in quality compared to the first two schools.

210 Participant details from each school are displayed in Table 1. There were four  
211 participant groups: students, physical education teachers, classroom teachers and principals.  
212 Participation is reported in terms of the number of individuals from each participant group  
213 who participated in each method of data collection (survey, observations, and focus  
214 groups/interviews; see the following section on data sources and procedures). In all, there  
215 were 78 survey participants, 15 classes that were observed and 29 focus group/interview  
216 participants. Age bands for the different school years (grades) are 5-6 for Year 1, 6-7 for Year  
217 2, 7-8 for Year 3, 8-9 for Year 4, 9-10 for Year 5, 10-11 for Year 6 and 11-12 for Year 7.

218 Table 1

### 219 *Participant Details*

|          | N  | F   | M   | $M_{Age}$ (SD) |
|----------|----|-----|-----|----------------|
| Surveys  |    |     |     |                |
| Students | 45 | 64% | 24% | 12.22 (1.47)   |

**WHOLE-OF-SCHOOL PHYSICAL ACTIVITY**

|                                    |    |      |     |              |
|------------------------------------|----|------|-----|--------------|
| Physical Education Teachers        | 18 | 39%  | 49% | 34.92 (3.94) |
| Classroom Teachers                 | 20 | 75%  | 10% | 36.06 (5.72) |
| Principals                         | 2  | 100% | 0%  | NR           |
| <b>Observations</b>                |    |      |     |              |
| Observation 1 (Year 6 Class)       | 11 | 55%  | 45% | NR           |
| Observation 2 (Year 1 Class)       | 2  | 100% | 0%  | NR           |
| Observation 3 (Year 3 Class)       | 14 | 36%  | 64% | NR           |
| Observation 4 (Year 4 Class)       | 18 | 56%  | 44% | NR           |
| Observation 5 (Year 4 Class)       | 17 | 35%  | 65% | NR           |
| Observation 6 (Year 5 Class)       | 23 | 74%  | 26% | NR           |
| Observation 7 (NR)                 | 2  | 100% | 0%  | NR           |
| Observation 8 (Year 6 Class)       | 9  | 67%  | 33% | NR           |
| Observation 9 (Year 4 Class)       | 13 | 62%  | 38% | NR           |
| Observation 10 (Year 5 Class)      | 2  | 100% | 0%  | NR           |
| Observation 11 (Year 4 Class)      | 25 | 36%  | 64% | NR           |
| Observation 12 (Year 3 Class)      | 4  | 75%  | 25% | NR           |
| Observation 13 (Year 7 Class)      | 17 | 88%  | 12% | NR           |
| Observation 14 (Year 1 Class)      | 6  | 50%  | 50% | NR           |
| Observation 15 (Year 5 Class)      | 4  | 75%  | 25% | NR           |
| <b>Focus Groups and Interviews</b> |    |      |     |              |
| Physical Education Teachers        | 17 | 22%  | 78% | 36.06 (6.18) |
| Classroom Teachers                 | 5  | 80%  | 20% | 35.00 (7.35) |
| Students                           | 7  | 57%  | 43% | 13.25 (0.71) |

220 Note: NR = Not reported.

221 **Data Sources and Procedures**

222 The Ethics Board at the [REDACTED] approved this study. School and  
 223 participant recruitment was conducted from August 8<sup>th</sup>, 2022 to January 30<sup>th</sup>, 2023.

## WHOLE-OF-SCHOOL PHYSICAL ACTIVITY

224 Participants provided written informed consent prior to the start of data collection.  
225 Parents/guardians provided consent for student participants. Data sources for this study  
226 included surveys, school observations, focus groups and individual interviews. The surveys  
227 and school observations provided quantitative data, while the focus groups and individual  
228 interviews provided qualitative data. A physical education teacher at each school served as  
229 the point of contact during the study and helped to recruit participants and facilitate data  
230 collection.

231 **Surveys.** Schools 2 and 3 participated in electronic surveys that were administered  
232 over a three-week period directly following Dubai 30x30 (School 1 opted not to participate in  
233 the surveys). The online survey platform JISC was used to create and distribute the surveys  
234 and manage the data. Weekly reminders were sent via email to increase the number of survey  
235 respondents. There were four surveys: one for students, one for physical education teachers,  
236 one for classroom teachers and one for principals. Students completed their survey during  
237 normal classroom time and with assistance from teachers, as needed.

238 Survey items pertinent to the current study focused on Dubai 30x30 activities before,  
239 during and after school (Research Question 1), students' participation in these activities  
240 (Research Question 2) and school staff's involvement in Dubai 30x30 (Research Question 4).  
241 Regarding Dubai 30x30 activities, school staff were asked to indicate the extent to which  
242 activities were provided in each of six contexts (physical education, classroom, recess/break,  
243 before school, after school, and weekends), whereas students were asked to indicate their  
244 level of participation in these activities. A six-point response scale was used. The response  
245 scale for school professionals ranged from "No Dubai 30x30 activities were provided" to "A  
246 lot of Dubai 30x30 activities were provided." Participants could also choose an option that  
247 stated, "I don't know where there were any Dubai 30x30 activities provided." The response  
248 scale for students ranged from "I did not participate at all in Dubai 30x30 activities" to "I

249 participated a lot in Dubai 30x30 activities.” Students could also choose the option, “There  
250 were no Dubai 30x30 activities provided.”

251 Items assessing staff involvement were adapted from existing measures developed in  
252 previous whole-of-school research (Orendorff et al., 2021; Stoepker et al., 2021; Webster et  
253 al., 2013). Example items include “I am involved with Dubai 30x30 planning at my school”  
254 (asked to all school staff), “I am involved with integrating Dubai 30x30 activities into  
255 physical education lessons” (asked only to physical education teachers), “I am involved with  
256 integrating Dubai 30x30 activities into my classroom lessons or as breaks/transitions during  
257 normal classroom time” (asked only to classroom teachers) and “I am involved with  
258 allocating resources for my school’s participation in Dubai 30x30” (asked only to principals).  
259 A six-point response scale was used, which ranged from “Strongly Disagree” to “Strongly  
260 Agree.”

261 The surveys also included a demographic section at the end. All participants were  
262 asked to identify their gender and their race/ethnicity. Additionally, students were asked to  
263 identify their age, while school staff were asked to indicate the levels at which they were  
264 teaching (e.g., elementary, secondary). An optional response format was used for all items on  
265 the surveys so that participants could skip questions if they wished to do so.

266 **Observations.** The Observational System for Recording Physical Activity in Children  
267 – Elementary School (OSRAC-E; McIver et al., 2016) was used to examine the relationship  
268 between students’ PA levels and contextual variables during school (Research Question 3).  
269 Although the instrument was designed for elementary school settings, much of the category  
270 system can be applied to secondary school settings, as well. Five categories from the  
271 instrument were used for the purposes of the present study: activity level, location, physical  
272 setting, instructional setting, and activity context. OSRAC-E uses a focal child protocol,  
273 whereby a single child is observed at a time using momentary time sampling. We employed a

## WHOLE-OF-SCHOOL PHYSICAL ACTIVITY

274 five-second observe interval followed by a 25-second record interval, which was repeated for  
275 five minutes with the same child. This observation procedure was used with as many children  
276 as possible during each school visit during the study.

277 In the week before observations were scheduled to commence, the second author  
278 conducted a two-hour training session on the observation protocols used for the study.  
279 Trainees were undergraduate students who volunteered to help with data collection and other  
280 aspects of the research. The session involved familiarizing the trainees with the OSRAC-E  
281 and testing the trainees' reliability in using the instrument. Inter-observer reliabilities were  
282 calculated using the following formula (van der Mars, 1989):

$$\frac{\text{Number of Agreements}}{\text{Number of Agreements} + \text{Disagreements}} \times 100 = \% \text{ Agreement}$$

283 Video examples were used for the training and to test inter-observer reliability. A reliability  
284 standard of 80% was considered acceptable (van der Mars, 1989). Total of eight trainees  
285 demonstrated acceptable inter-observer agreement proceeded with conducting observations  
286 the following week.

287 A second two-hour training session was held after the first week of data collection to help  
288 prevent observer drift and address any unanticipated challenges with data collection. During  
289 this session, observers shared their experiences doing the observations and suggested ways to  
290 help increase inter-observer reliability. Suggestions mainly focused on how to record unusual  
291 activities or types of behavior using the OSRAC-E. The session also included additional  
292 opportunities for observers to practice using the using more video examples and concluded  
293 with another round of reliability testing, which resulted in acceptable levels of agreement  
294 (above 80%) for all observers.

295 Observations were conducted across 15 classrooms from Schools 2 and 3 during the  
296 full month of Dubai 30x30 (School 1 opted not to participate in the observations).  
297 Observation days and times were scheduled in accordance with when the observers were  
298 available and when the schools were able to accommodate observers. In total, observations  
299 were conducted for 10.25 hours across 12 days. During each school visit, observers usually  
300 stayed with a single class of students and followed the class during the full observation period  
301 (approximately 2-7 hours). This allowed for data to be collected in different instructional  
302 contexts (e.g., homeroom, physical education). Observation shifts lasted two and a half hours  
303 for each observer to help prevent exhaustion and loss of focus. Additional inter-observer  
304 reliability checks were conducted in the third and fourth weeks of data collection with  
305 agreement scores indicating acceptable reliability.

306 **Focus groups and interviews.** A total of six focus groups and two individual  
307 interviews were conducted (see Table 1 for participant details). The purpose of the focus  
308 groups and interviews was two-fold. First, they were intended to provide additional  
309 information about Dubai 30x30 activities (Research Question 1) and the  
310 involvement/engagement of school staff, families, and community partners in promoting  
311 Dubai 30x30 (Research Question 4). Second, they were designed to address school staff's  
312 perceived successes and challenges involved with implementing Dubai 30x30 (Research  
313 Question 5) and participants' perceived impact of the initiative on students, families, and the  
314 community (Research Question 6). A semi-structured format was used to allow for some  
315 flexibility in each focus group/interview. Examples of questions include "What did your  
316 school do in the name of Dubai 30x30 this school year?", "Describe your involvement in  
317 Dubai 30x30 this school year as a physical education/classroom teacher/principal. What roles  
318 did you play?", "From your perspective, what were notable successes for your school during  
319 its involvement with Dubai 30x30 this school year?", "Describe any challenges or problems

320 you remember from your school’s involvement with Dubai 30x30 this school year?” and  
321 “What was the impact of your school’s involvement in Dubai 30x30?” Additionally, prompts  
322 were used for clarification and to explore participants’ responses in more depth. Following  
323 recommended protocols, two researchers conducted each focus group with one researcher  
324 asking questions and the other researcher taking notes and helping to moderate, when needed  
325 (Krueger & Casey, 2014). Interviews/focus groups generally lasted 30 minutes, were  
326 conducted either in person at participants’ schools or online via Zoom and were audio  
327 recorded.

### 328 **Data Analysis**

329 **Surveys.** Microsoft Excel was used to calculate descriptive statistics, including means  
330 and standard deviations, for the extent of Dubai 30x30 activities before, during and after  
331 school (Research Question 1), the extent of students’ participation in Dubai 30x30 activities  
332 (Research Question 2) and the extent of involvement/engagement of school staff in  
333 promoting Dubai 30x30 (Research Question 4).

334 **Observations.** To examine the relationship between students’ PA and contextual  
335 variables during school (Research Question 3), the likelihood of students engaging in each  
336 activity level was estimated using multinomial logistic regression with students engaging in  
337 stationary as the referent group. Analyses were completed using STATA (v.16.1, STATA  
338 Corporation LLC, College Station, TX).

339 **Focus groups and interviews.** All audio recordings were transcribed verbatim for  
340 analysis. Open and axial coding were used to develop themes in the data (Strauss & Corbin,  
341 1990). Specifically, the first author read each transcript to become familiar with participants’  
342 responses. Then, he initiated open coding, which involved writing memos that  
343 summarized/interpreted the responses (or parts of responses) in each transcript that seemed  
344 helpful in addressing Research Questions 1, 4, 5 and 6. This process continued iteratively,

345 allowing for revisions and additions to the memos as the author made additional passes  
346 through the transcripts and developed his understanding of the major ideas underlying the  
347 data. Subsequently, the author used axial coding to search across transcripts for memos  
348 suggesting similar ideas. He synthesized these memos into broader ideas related to each  
349 research question to develop themes. To help ensure trustworthiness (Lincoln & Guba, 1985),  
350 the second author served as a peer debriefer throughout the analysis, regularly meeting with  
351 the first author to discuss the analysis process, the coding, and the themes. Trustworthiness  
352 was also established through the triangulation of multiple data sources.

## 353 **Results**

### 354 **Research Question 1: Dubai 30x30 Activities Before, During and After School**

355 Descriptive statistics and themes related to Research Question 1 are shown in Table 2.  
356 School staff indicated on their surveys that there were more Dubai 30x30 activities provided  
357 during physical education than in other contexts. Recess/other breaks during school and  
358 before and after school periods were also identified as times when there were a fair amount of  
359 Dubai 30x30 activities provided. Participants felt that there were very few Dubai 30x30  
360 activities provided during classroom time and on weekends. Themes and supporting evidence  
361 from the focus group and interview data are presented in Table 3. The themes converged with  
362 the survey data in that all participant groups (physical education teachers, classroom teachers  
363 and students) and the principal spoke about Dubai 30x30 activities that were offered during  
364 break times and before and after school. There was also a theme characterized by a recurring  
365 competitive element to many of the activities. Surprisingly, physical education was seldom  
366 mentioned in relation to Dubai 30x30 activities, which contrasted with the survey data.

367 Table 2



**WHOLE-OF-SCHOOL PHYSICAL ACTIVITY**

368 *Research Question 1: Extent of Dubai 30x30 Activities Provided Before, During and After*  
 369 *School (Combined Descriptive Data from Surveys Administered to Physical Education*  
 370 *Teachers, Classroom Teachers, and Principals)*

|    | Physical Education | Classroom | Recess/Other Break Times | Before School | After School | Weekends |
|----|--------------------|-----------|--------------------------|---------------|--------------|----------|
| M  | 4.90               | 2.81      | 4.79                     | 4.16          | 4.70         | 2.66     |
| SD | 1.72               | 1.45      | 1.32                     | 1.55          | 1.41         | 1.88     |
| N  | 40                 | 32        | 39                       | 38            | 37           | 32       |

371  
 372 Table 3

373 *Research Question 1: Extent and Nature of Dubai 30x30 Activities Provided Before, During*  
 374 *and After School (Themes and Supporting Evidence from Focus Group and Interview Data)*

| Theme                   | Supporting Evidence                                                                                                                                                                                                                                                                                                                                                                                                                                                                                                                                                                                                                                                                                                                                       |
|-------------------------|-----------------------------------------------------------------------------------------------------------------------------------------------------------------------------------------------------------------------------------------------------------------------------------------------------------------------------------------------------------------------------------------------------------------------------------------------------------------------------------------------------------------------------------------------------------------------------------------------------------------------------------------------------------------------------------------------------------------------------------------------------------|
| Break Time              | <p>“During break times we had opportunities for students to take part in organized activities, so we opened the [sports facilities] to the year sevens so they could participate in various activities such as football, basketball, and netball” (PE Teacher 3, School 1)</p> <p>“So, we had, like Miss Stanley would often go out, and [put] the music on [at] lunchtime. We’d have a chance to like, dance and get active” (Classroom Teacher 1, School 3)</p> <p>“We did daily activities with the children. Those were done at break time options, with different Dubai 30 activities” (Principal, School 3)</p> <p>“There were cool [activities]...at break times there were many teachers and basketball kinds of stuff” (Student 1, School 2)</p> |
| Before and After School | <p>“Before school, we had the various activities that relate to PE and sport...we had swimming...there was netball as well, athletics down at the stadium, there was</p>                                                                                                                                                                                                                                                                                                                                                                                                                                                                                                                                                                                  |

## WHOLE-OF-SCHOOL PHYSICAL ACTIVITY

golf also...rugby, football, fitness, yeah, the fitness sessions for the staff as well, fitness session for the students, for parents...there were swimming activities also” (PE Teacher 3, School 3)

“So, our clubs start at 6.45. So, and that takes us up then to registration. So, we [were] there was Monday, Tuesday, Wednesday, Thursday, Friday. There was something on every day and then at 7.30 I would go and do the Wake Up, Shake Ups twice a week as well” (PE Teacher 1, School 1)

When asked to discuss some of the activities taking place after school, PE Teacher 1 from School 3 said the following “Netball, basketball, rugby, football, table tennis, tennis, football, skiing, taekwondo, jujitsu, karate, gymnastics, acro dance, musical theatre, ballet and that is most of the activities run from FS all the way through to year 7”

“We had a color run thing at school with the parents that involved, and one evening as well” (Classroom Teacher 1, School 3)

Competitions PE Teacher 1 from School 3 who said “So we try and get them involved in a competition format as well” (PE Teacher 1, School 3)

“We obviously did a competition as well, so those that did, you know, complete the diaries the most we gave them T-shirts, and we just made a big song and dance of it in assembly” (PE Teacher 1, School 2)

“[Students] also get awards within the classroom for [participation] as well. But they’re also included within the house reward system. So, house points” (PE Teacher 3, School 3)

“We had a full competition with the diary daily. So, the children could, if they took part in that Dubai 30 challenge...they recorded it in a journal, and then [submitted] that into the PE Team Department. I can't (remember) the prize what they got for that, house points, I think” (Classroom Teacher 3, School 3)

**WHOLE-OF-SCHOOL PHYSICAL ACTIVITY**

“There was quite a lot of challenges going on as well” (Classroom Teacher 1, School 3)

“There was this one dance competition in school between houses like we had to like, choose which house that's the best and it was on the field” (Student 1, School 2)

When asked what gets him excited about participating in Dubai 30x30, Student 2’s (School 2) immediate response was “Competition”

375

376 **Research Question 2: Students’ Participation in Dubai 30x30 Activities**

377 Table 4 displays the descriptive statistics related to Research Question 2. Consistent  
 378 with school staff’s survey responses regarding the extent of Dubai 30x30 activities provided  
 379 in different contexts, students reported participating a fair amount in Dubai 30x30 activities  
 380 during physical education and very little in such activities during classroom time. However,  
 381 in contrast to the school staff survey data, students indicated they participated very little in  
 382 Dubai 30x30 activities during recess/other break times and occasionally participated in  
 383 initiative-related activities after school and on weekends.

384 Table 4

385 *Research Question 2: Extent of Students’ Participation in Dubai 30x30 Activities Before,*  
 386 *During and After School (Data from Survey Administered to Students)*

|    | Physical Education | Classroom | Recess/Other Break Times | Before School | After School | Weekends |
|----|--------------------|-----------|--------------------------|---------------|--------------|----------|
| M  | 4.20               | 2.79      | 2.70                     | 2.24          | 3.0          | 3.19     |
| SD | 1.56               | 1.61      | 1.70                     | 1.67          | 1.77         | 1.85     |
| N  | 45                 | 38        | 40                       | 41            | 44           | 44       |

387

**WHOLE-OF-SCHOOL PHYSICAL ACTIVITY**

**Research Question 3: Relationship between Students’ PA Levels and Contextual Variables During School**

Results of the multinomial logistic regression models are presented in Table 5. Several physical setting variables were related to students’ engagement in activity. For example, children were 2.39 (95CI=1.08, 5.28) and 52.36 (95CI=13.12, >100.00) times as likely to engage in slow easy and fast activity in the gym compared to the classroom. Further, the playground, sports fields and other physical settings showed similar relationships with children’s physical activity. At the playground children were 6.02 (95CI=2.02, 17.92), 6.48 (95CI=3.49, 12.02) and 110.66 (95CI=31.34, >100.00) times as likely to engage in slow easy, moderate, and fast activity compared to the classroom. At the sports field children were 5.69 (95CI=2.65, 12.02), 4.86 (95CI=1.85, 12.77) and 55.34 (95CI=12.52, >100.00) times as likely to engage in slow easy, moderate, and fast activity compared to the classroom. In other physical settings children were 9.81 (95CI=3.06, 31.50), 6.91 (95CI=1.92, 24.95) and 36.90 (95CI=3.15, >100.00) times as likely to engage in slow easy, moderate, and fast activity compared to the classroom. In the multipurpose room children were 4.19 (95CI=2.05, 8.58) and 4.59 (95CI=1.81, 11.66) times as likely to engage in limbs and slow easy, but <0.00 (95CI= <0.00, <0.00) times as likely to engage in both moderate and fast activity when compared to the classroom.

Table 5

*Research Question 3: Relationship between Students’ PA Levels and School Context (Multinomial Logistic Regression of Activity Levels by OSRAC-E Variables)*

|                         |     | Limbs |               |              | Slow Easy   |               |               | Moderate |                   |                  | Fast         |                   |                    |
|-------------------------|-----|-------|---------------|--------------|-------------|---------------|---------------|----------|-------------------|------------------|--------------|-------------------|--------------------|
| Physical Setting        | n   |       |               |              |             |               |               |          |                   |                  |              |                   |                    |
| Classroom<br>(constant) | 848 | -     | -             | -            | -           | -             | -             | -        | -                 | -                | -            | -                 | -                  |
| Gym                     | 219 | 0.64  | (0.35,        | 1.18)        | <b>2.39</b> | <b>(1.08,</b> | <b>5.28)</b>  | 2.38     | (0.97,            | 5.84)            | <b>52.36</b> | <b>(13.12,</b>    | <b>&gt;100.00)</b> |
| Multipurpose<br>Room    | 50  | 4.19  | <b>(2.05,</b> | <b>8.58)</b> | <b>4.59</b> | <b>(1.81,</b> | <b>11.66)</b> | <0.00    | <b>(&lt;0.00,</b> | <b>&lt;0.00)</b> | <0.00        | <b>(&lt;0.00,</b> | <b>&lt;0.00)</b>   |

**WHOLE-OF-SCHOOL PHYSICAL ACTIVITY**

|                             |       |             |                     |                 |                             |                 |                             |                  |                    |                   |
|-----------------------------|-------|-------------|---------------------|-----------------|-----------------------------|-----------------|-----------------------------|------------------|--------------------|-------------------|
| Play Group                  | 40    | 0.99        | (0.22, 4.54)        | <b>6.02</b>     | <b>(2.02, 17.92)</b>        | 6.48            | (3.49, 12.02)               | <b>&gt;100.0</b> | <b>(31.34,</b>     | <b>&gt;100.00</b> |
|                             |       |             |                     |                 |                             |                 |                             | <b>0</b>         | <b>)</b>           | <b>)</b>          |
| Sports Field                | 145   | 1.19        | (0.56, 2.53)        | <b>5.69</b>     | <b>(2.65, 12.22)</b>        | 4.86            | (1.85, 12.77)               | <b>55.34</b>     | <b>(12.52,</b>     | <b>&gt;100.00</b> |
|                             |       |             |                     |                 |                             |                 |                             |                  | <b>)</b>           | <b>)</b>          |
| Other Physical Setting      | 67    | 1.06        | (0.59, 1.89)        | <b>9.81</b>     | <b>(3.06, 31.50)</b>        | 6.91            | (1.92, 24.95)               | <b>36.90</b>     | <b>(3.15,</b>      | <b>&gt;100.00</b> |
|                             |       |             |                     |                 |                             |                 |                             |                  | <b>)</b>           | <b>)</b>          |
| <hr/>                       |       |             |                     |                 |                             |                 |                             |                  |                    |                   |
| Location                    |       |             |                     |                 |                             |                 |                             |                  |                    |                   |
| Inside (constant)           | 1,132 | -           | -                   | -               | -                           | -               | -                           | -                | -                  | -                 |
| Outside or Transition       | 237   | <b>0.92</b> | <b>(0.50, 1.69)</b> | <b>4.40</b>     | <b>(2.40, 8.09)</b>         | <b>4.13</b>     | <b>(1.99, 8.57)</b>         | <b>6.55</b>      | <b>(2.54,</b>      | <b>16.92)</b>     |
|                             |       |             |                     |                 |                             |                 |                             |                  |                    |                   |
| <hr/>                       |       |             |                     |                 |                             |                 |                             |                  |                    |                   |
| Instructional Setting       |       |             |                     |                 |                             |                 |                             |                  |                    |                   |
| Core Class (constant)       | 728   | -           | -                   | -               | -                           | -               | -                           | -                | -                  | -                 |
| Lunch                       | 49    | 1.09        | (0.23, 5.19)        | <b>&lt;0.00</b> | <b>(&lt;0.00, &lt;0.00)</b> | <b>&lt;0.00</b> | <b>(&lt;0.00, &lt;0.00)</b> | <b>&lt;0.00</b>  | <b>(&lt;0.00,</b>  | <b>&lt;0.00)</b>  |
| Music                       | 40    | <b>3.16</b> | <b>(1.80, 5.54)</b> | <b>4.44</b>     | <b>(1.73, 11.40)</b>        | <b>&lt;0.00</b> | <b>(&lt;0.00, &lt;0.00)</b> | <b>&lt;0.00</b>  | <b>(&lt;0.00,</b>  | <b>&lt;0.00)</b>  |
| Physical Education          | 299   | 0.72        | (0.40, 1.29)        | <b>3.47</b>     | <b>(1.76, 6.85)</b>         | <b>3.54</b>     | <b>(1.53, 8.19)</b>         | <b>&gt;100.0</b> | <b>(18.78,</b>     | <b>&gt;100.00</b> |
|                             |       |             |                     |                 |                             |                 |                             | <b>0</b>         | <b>)</b>           | <b>)</b>          |
| Recess                      | 106   | 1.11        | (0.57, 2.18)        | <b>3.14</b>     | <b>(1.21, 8.18)</b>         | <b>3.84</b>     | <b>(1.52, 9.69)</b>         | <b>&gt;100.0</b> | <b>(15.74,</b>     | <b>&gt;100.00</b> |
|                             |       |             |                     |                 |                             |                 |                             | <b>0</b>         | <b>)</b>           | <b>)</b>          |
| Other Instructional Setting | 147   | 1.90        | (0.82, 4.42)        | <b>3.52</b>     | <b>(1.10, 11.26)</b>        | 3.01            | (0.79, 11.40)               | <b>46.38</b>     | <b>(3.93,</b>      | <b>546.74)</b>    |
|                             |       |             |                     |                 |                             |                 |                             |                  |                    |                   |
| <hr/>                       |       |             |                     |                 |                             |                 |                             |                  |                    |                   |
| Activity Context            |       |             |                     |                 |                             |                 |                             |                  |                    |                   |
| Academics                   | 508   | -           | -                   | -               | -                           | -               | -                           | -                | -                  | -                 |
| Open Space                  | 40    | 0.62        | (0.19, 2.01)        | 2.54            | (0.90, 7.19)                | <b>19.83</b>    | <b>(4.75, 82.79)</b>        | <b>&gt;100.0</b> | <b>(&gt;100.0,</b> | <b>&gt;100.00</b> |
|                             |       |             |                     |                 |                             |                 |                             | <b>0</b>         | <b>0,</b>          | <b>)</b>          |
| Snack                       | 72    | 1.07        | (0.29, 3.89)        | 0.59            | (0.11, 3.32)                | 5.55            | (0.83, 36.95)               | 1.06             | (0.39, 2.87)       |                   |
| Teacher Arranged            | 561   | 1.20        | (0.76, 1.89)        | <b>5.14</b>     | <b>(2.64, 10.01)</b>        | <b>15.01</b>    | <b>(4.06, 55.44)</b>        | <b>&gt;100.0</b> | <b>(&gt;100.0,</b> | <b>&gt;100.00</b> |
|                             |       |             |                     |                 |                             |                 |                             | <b>0</b>         | <b>0,</b>          | <b>)</b>          |
| Other Activity Context      | 188   | 1.45        | (0.78, 2.69)        | <b>8.36</b>     | <b>(3.13, 22.33)</b>        | <b>29.38</b>    | <b>(6.59, &gt;100.00)</b>   | <b>&gt;100.0</b> | <b>(&gt;100.0,</b> | <b>&gt;100.00</b> |
|                             |       |             |                     |                 |                             |                 |                             | <b>0</b>         | <b>0,</b>          | <b>)</b>          |

388

389

390

391

392

393

394

395

396

Location, instructional setting and activity context were also related to children’s activity level. Children were 4.40 (95CI=2.40, 8.09), 4.13 (95CI=1.99, 8.57), and 6.55 (95CI=2.54, 16.92) times as likely to engage in slow easy, moderate, and fast activity when outside or in transition compared to when they were inside. With respect to instructional setting, children were <0.00 (95CI= <0.00, <0.00) times as likely to engage in slow easy, moderate, or fast activity during lunch compared to core class time. Conversely, during music, children were 3.16 (95CI=1.80, 5.54) and 4.44 (95CI=1.73, 11.40) times as likely to engage in limbs and slow easy activity, but <0.00 (95CI= <0.00, <0.00) times as likely to

## WHOLE-OF-SCHOOL PHYSICAL ACTIVITY

397 engage in moderate or fast activity when compared to core class time. During physical  
398 education, children were 3.47 (95CI=1.76, 6.85), 3.54 (95CI=1.53, 8.19), and >100.00  
399 (95CI=18.78, >100.00) times as likely to engage in slow easy, moderate, and fast activity  
400 compared to core class time. Similarly, during recess children were 3.14 (95CI=1.21, 8.18),  
401 3.84 (95CI=1.52, 9.69), and >100.00 (95CI=15.74, >100.00) times as likely to engage in slow  
402 easy, moderate, and fast activity compared to core class time. In other instructional settings,  
403 children were 3.52 (95CI=1.10, 11.26) and 46.38 (95CI=3.93, >100.00) s likely to engage in  
404 slow easy and fast activity compared to core class time.

405       Regarding activity context, children were 19.83 (95CI=4.75, 82.79), and >100.00  
406 (95CI=>100.00, >100.00) times as likely to engage in moderate and fast activity during open  
407 space activities compared to academic activities. During teacher organized activities, children  
408 were 5.14 (95CI=2.64, 10.01), 15.01 (95CI=4.06, 55.44), and >100.00 (95CI=>100.00,  
409 >100.00) times as likely to engage in slow easy, moderate, and fast activity compared to  
410 academic activities. Finally, during other activity contexts children were 8.36 (95CI=3.13,  
411 22.33), 29.38 (95CI=6.59, >100.00), and >100.00 (95CI=>100.00, >100.00) times as likely to  
412 engage in slow easy, moderate, and fast activity compared to academic activities.

### 413 **Research Question 4: Involvement/Engagement of School Staff, Families and** 414 **Community Partners**

415       Table 6 displays the descriptive statistics related to Research Question 4. Overall,  
416 physical education teachers' perceived involvement in promoting Dubai 30x30 was higher  
417 than classroom teachers' or principals' perceived involvement. Physical education teachers  
418 somewhat agreed that they were involved in integrating Dubai 30x30 activities into their  
419 lessons, promoting Dubai 30x30 activities outside of physical education, generating support  
420 from others to implement Dubai 30x30 activities, finding solutions to problems with  
421 implementing Dubai 30x30 activities, planning Dubai 30x30 activities, organizing Dubai

**WHOLE-OF-SCHOOL PHYSICAL ACTIVITY**

422 30x30 activities, advocating for the school’s involvement in Dubai 30x30 and serving as a  
 423 health/fitness role model. Principals’ perceived involvement was second highest overall in  
 424 comparison to physical education teachers and classroom teachers. Principals agreed that they  
 425 were involved with allocating resources for their school’s participation in Dubai 30x30 and  
 426 advocating for their school’s involvement in Dubai 30x30. They somewhat agreed that they  
 427 were involved in evaluating the school’s participation in Dubai 30x30, establishing Dubai  
 428 30x30 activities at the school, setting performance standards for the school’s participation in  
 429 Dubai 30x30, building/maintaining partnerships for implementing/sustaining Dubai 30x30,  
 430 planning for Dubai 30x30 implementation and being a healthy/fit role model. Classroom  
 431 teachers disagreed/somewhat disagreed about their involvement across all relevant items.

432 Table 6

433 *Research Question 4: Involvement/Engagement of School Staff in Promoting Dubai 30x30*  
 434 *(Data from Surveys Administered to Physical Education Teachers, Classroom Teachers and*  
 435 *Principals)*

|                                                                                                 | Physical Education Teachers |      |    | Classroom Teachers |      |     | Principals |     |     |
|-------------------------------------------------------------------------------------------------|-----------------------------|------|----|--------------------|------|-----|------------|-----|-----|
| Survey Item                                                                                     | M                           | SD   | N  | M                  | SD   | N   | M          | SD  | N   |
| I am involved with integrating Dubai 30x30 activities into physical education lessons (PE only) | 4.72                        | 1.53 | 18 | N/A                | N/A  | N/A | N/A        | N/A | N/A |
| I am involved with promoting Dubai 30x30 activities outside of physical education (PE only)     | 4.50                        | 1.50 | 18 | N/A                | N/A  | N/A | N/A        | N/A | N/A |
| I am involved with generating support from others (e.g., parents,                               | 4.55                        | 1.46 | 18 | 2.95               | 1.28 | 20  | N/A        | N/A | N/A |

**WHOLE-OF-SCHOOL PHYSICAL ACTIVITY**

other teachers) to implement Dubai

30x30 activities (PE and Classroom only)

I am involved with securing 3.94 1.52 17 2.16 1.21 20 N/A N/A N/A

resources to implement Dubai 30x30 activities (PE and Classroom only)

I am involved with collaboration 4.44 1.65 18 2.60 1.35 20 N/A N/A N/A

among others (e.g., colleagues, parents, community partners) to maximize my school's provision of Dubai 30x30 activities (PE and Classroom only)

I am involved with finding solutions 4.33 1.41 18 2.11 1.56 20 N/A N/A N/A

to problems that could limit my school's ability to provide Dubai 30x30 activities (PE and Classroom only)

I am involved with integrating Dubai 30x30 activities into my classroom N/A N/A N/A 3.10 1.41 20 N/A N/A N/A

lessons or as breaks/transitions during normal classroom time (Classroom only)

I am involved with providing Dubai 30x30 activities during recess or other break times during school N/A N/A N/A 3.05 1.32 20 N/A N/A N/A

(Classroom only)



**WHOLE-OF-SCHOOL PHYSICAL ACTIVITY**

|                                                                                                                                                                  |      |      |     |      |      |     |      |      |   |
|------------------------------------------------------------------------------------------------------------------------------------------------------------------|------|------|-----|------|------|-----|------|------|---|
| I am involved with evaluating my school's participation in Dubai 30x30 (Principals only)                                                                         | N/A  | N/A  | N/A | N/A  | N/A  | N/A | 4.50 | 0.71 | 2 |
| I am involved with providing professional development opportunities related to Dubai 30x30 at my school (Principals only)                                        | N/A  | N/A  | N/A | N/A  | N/A  | N/A | 3.00 | 2.83 | 2 |
| I am involved with establishing Dubai 30x30 activities at my school (Principals only)                                                                            | N/A  | N/A  | N/A | N/A  | N/A  | N/A | 4.00 | 0    | 2 |
| I am involved with setting performance standards for my school's participation in Dubai 30x30 (Principals only)                                                  | N/A  | N/A  | N/A | N/A  | N/A  | N/A | 4.00 | 0    | 2 |
| I am involved with allocating resources for my school's participation in Dubai 30x30 (Principals only)                                                           | N/A  | N/A  | N/A | N/A  | N/A  | N/A | 5.00 | 0    | 2 |
| I am involved with building/maintaining partnerships with community constituents to implement/sustain my school's participation in Dubai 30x30 (Principals only) | N/A  | N/A  | N/A | N/A  | N/A  | N/A | 4.00 | 0    | 2 |
| I am involved with Dubai 30x30 planning at my school                                                                                                             | 4.72 | 1.23 | 18  | 2.25 | 1.45 | 20  | 4.50 | 0.71 | 2 |

**WHOLE-OF-SCHOOL PHYSICAL ACTIVITY**

|                                                                                                                                                        |      |      |     |      |      |     |      |      |     |
|--------------------------------------------------------------------------------------------------------------------------------------------------------|------|------|-----|------|------|-----|------|------|-----|
| I am involved with serving on my school's Dubai 30x30 committee or other related (e.g., school wellness committee, board, or task force                | 3.11 | 1.91 | 18  | 2.11 | 1.56 | 20  | 3.00 | 1.41 | 2   |
| I am involved with organizing Dubai 30x30 activities at my school                                                                                      | 4.39 | 1.33 | 18  | 2.35 | 1.37 | 20  | 2.00 | 0    | 2   |
| I am involved with staying up to date on best practices for school health/wellness programming in relation to my school's participation in Dubai 30x30 | 3.78 | 1.66 | 18  | 2.85 | 1.42 | 20  | 3.50 | 0.71 | 2   |
| I am involved with advocating for my school's participation in Dubai 30x30                                                                             | 4.28 | 1.49 | 18  | 3.63 | 1.57 | 20  | 5.50 | 0.71 | 2   |
| I am involved with being a health/fitness role model for others in my school during Dubai 30x30                                                        | 4.83 | 1.20 | 18  | 3.25 | 1.68 | 20  | 4.50 | 0.71 | 2   |
| <i>Total Involvement Score</i>                                                                                                                         | 4.31 | N/A  | N/A | 2.73 | N/A  | N/A | 3.96 | N/A  | N/A |

436

437 Themes and supporting evidence related to Research Question 4 are presented in  
 438 Table 7. The first theme, “Physical Education Teachers as Dubai 30x30 Leaders,” closely  
 439 aligns with the survey data, further demonstrating that physical education teachers were  
 440 distinctly involved in schools’ implementation of the initiative. The common approach was  
 441 for someone on the physical education team to spearhead the planning and organization of  
 442 Dubai 30x30 activities, guide the other physical education teachers in their efforts to support  
 443 the implementation of the activities and serve as the primary liaison for other school staff,  
 444 parents and any other entities who were involved. The second them focused on parent

**WHOLE-OF-SCHOOL PHYSICAL ACTIVITY**

445 engagement, which mainly entailed parents participating in various activities that the school  
 446 provided, some of which were specifically designed for parents.

447 Table 7

448 *Research Question 4: Involvement/Engagement of School Staff, Families and Community*  
 449 *Partners in Promoting Dubai 30x30 (Themes and Supporting Evidence from School Staff*  
 450 *Focus Group and Interview Data)*

| Theme                                              | Supporting Evidence                                                                                                                                                                                                                                                                                                                                                                                                                                                                                                                                                                                                                                                                                                                                                                                                                                                                                                                                                                                                                                                                                                            |
|----------------------------------------------------|--------------------------------------------------------------------------------------------------------------------------------------------------------------------------------------------------------------------------------------------------------------------------------------------------------------------------------------------------------------------------------------------------------------------------------------------------------------------------------------------------------------------------------------------------------------------------------------------------------------------------------------------------------------------------------------------------------------------------------------------------------------------------------------------------------------------------------------------------------------------------------------------------------------------------------------------------------------------------------------------------------------------------------------------------------------------------------------------------------------------------------|
| Physical Education Teachers as Dubai 30x30 Leaders | <p>“So, I was the Dubai30/30 champion as that, that's what they called the lead role in the school. So, I was the one that coordinated everything in the school basically and just I had my, you know the PE Team. I, I didn't obviously tell them what to do, but anything I needed support with, or I needed them to organise or help with. I would, you know, give them the instructions there, the emails to parents would come from me any communication I would be passing on. So yeah, just to coordinate you just the coordinator of it for your whole school.” (PE Teacher 1, School 3)</p> <p>“[PE Teacher 1, School 3] drove the whole thing...Gave us a set of some guidelines and I'd say most of us chipped in with different ideas. All of us definitely supported the events, things that happened whether it was accompanying the kids on the that trip, whether it was getting involved...in fact all of us helped with the night run, which is a really, from a parental perspective, really launched the whole connection between people – staff and parents – with the 30/30 (PE Teacher 2, School 3)</p> |
| Parent Engagement                                  | <p>“We did a parent challenge where we ran fitness [activities] at drop off, and children nominated their parents to be part of that... parents [came] in and participat[ed] in our morning runs, and our morning cycles, [and] in the night run.” (Principal, School 3)</p>                                                                                                                                                                                                                                                                                                                                                                                                                                                                                                                                                                                                                                                                                                                                                                                                                                                   |

## WHOLE-OF-SCHOOL PHYSICAL ACTIVITY

“The Wake Up, Shake Ups – all the parents coming in and getting involved was lovely, lovely to see.” (PE Teacher 1, School 1)

“A lot of staff got a little bit more motivated to try to get involved with other [activities] because they saw the positive response from the kids and the parents” (PE Teacher 3, School 3)

“My mother and dad are really into Dubai 30x30, and they are also involved” (Student 1, School 2)

451

---

### 452 **Research Question 5: School Staff’s Perceived Successes and Challenges of Dubai 30x30**

#### 453 **Implementation**

454 Themes and supporting evidence related to Research Question 5 are presented in  
455 Table 8. Implementation successes were described in terms of communities coming together.  
456 Implementation challenges were mainly discussed relative to the lack of guidance and the  
457 pressures placed on physical education staff.

458 Table 8

459 *Research Question 5: School Staff’s Perceived Implementation Successes and Challenges*

460 *(Themes and Supporting Evidence from School Staff Focus Group and Interview Data)*

---

| Theme                       | Supporting Evidence                                                                                                                                                                                                                                                                                                                     |
|-----------------------------|-----------------------------------------------------------------------------------------------------------------------------------------------------------------------------------------------------------------------------------------------------------------------------------------------------------------------------------------|
| Communities Coming Together | “It was a really good focus to bring the community together” (Principal, School 3)<br><br>“It’s a good sense of community, really brings everybody together. And there’s such a wide range of activities available, even if you’re not the most sporty person, it’s something that everybody can enjoy” (Classroom Teacher 3, School 3) |

## WHOLE-OF-SCHOOL PHYSICAL ACTIVITY

---

|                                       |                                                                                                                                                                                                                                                                                                                                                                                                                                                                                                                 |
|---------------------------------------|-----------------------------------------------------------------------------------------------------------------------------------------------------------------------------------------------------------------------------------------------------------------------------------------------------------------------------------------------------------------------------------------------------------------------------------------------------------------------------------------------------------------|
|                                       | <p>“It felt like we were all kind of one big team...all of the staff, the parents and the pupils all participating together. It was nice that we were all working together. Everyone had the same goal of getting the 30 minutes in” (PE Teacher 2, School 3)</p> <p>“I think it makes people come together as a community...it opens up the field for a lot of activities that involve children, parents and staff” (Classroom Teacher 2, School 3)</p>                                                        |
| Lack of Guidance                      | <p>“There aren’t any set guidelines as to how much a school needs to be doing...there needs to be a little bit more clarity from [the government] as to what the targets for each school [should be] because I know that we did a lot, but then I spoke to another school and they literally just had a poster” (PE Teacher 3, School 3)</p> <p>“I took on [being the Dubai 30x30 champion for the school], not really knowing (being my first year) what I was meant to be doing” (PE Teacher 1, School 1)</p> |
| Pressures on Physical Education Staff | <p>“It is a big task for just one department to do...It’s a lot lumped into one month...you feel, you know, you’ve got to keep banging that drum in between doing everything you do in your day job anyway” (PE Teacher 3, School 3)</p>                                                                                                                                                                                                                                                                        |

---

## WHOLE-OF-SCHOOL PHYSICAL ACTIVITY

“The main challenge for us was just the timing of our daily schedules and the [school inspections by the government] and then trying to do this additionally...I did feel I wanted to do more, and I physically couldn’t because I had not time” (PE Teacher 1, School 1)

“I don’t think we found any challenges [although] it’s just fitting everything into a busy time, isn’t it? That’s the thing” (Principal, School 3)

461

---

### 462 **Research Question 6: Participants’ Perceived Impact of Dubai 30x30**

463 The themes and supporting evidence related to Research Question 6 are displayed in  
464 Table 9. There were two themes: (a) increased PA and (b) promotion of the school. Many of  
465 the statements participants made about the impact of Dubai 30x30 focused on increased PA  
466 for youth and parents. Promotion of the school constituted a smaller theme that became  
467 apparent within the transcripts from participants at School 3.

468 Table 9

469 *Research Question 6: Perceived Impact of Dubai 30x30 (Themes and Supporting Evidence*  
470 *from Focus Group and Interview Data)*

---

| Theme        | Supporting Evidence                                                                                                                                                |
|--------------|--------------------------------------------------------------------------------------------------------------------------------------------------------------------|
| Increased PA | “I think Dubai 30x30 started my consistency [with exercise] because before, I didn’t really exercise but now I’m more consistent with it”<br>(Student 1, School 2) |

---

## WHOLE-OF-SCHOOL PHYSICAL ACTIVITY

---

“I actually started wanting to work out more. I started going to the gym...now I go two times a week. I know it’s definitely affected my brother a lot. He also does gym now. He started like this whole plan and everything. I feel like the things you do and if you find them enjoyable at school you are most likely to do them outside of school” (Student 2, School 2)

“There were children that would come to me and go, ‘Miss, I did this at the weekend’ or ‘I did that at the weekend’ and you know that Dubai 30x30’s inspired them to do that and that wouldn’t have happened maybe before” (PE Teacher, School 1)

“Wake Up, Shake Ups” we still do now. So there’s been a lasting impact” (Classroom Teacher 2, School 3)

“It’s getting back into exercise. I think it’s the timing of the year but also, we had a bike and treadmill at reception and there were a lot of parents that came in and said, ‘I haven’t cycled for years, and I think the impact, you know, we’ve got huge cycle tracks [in Dubai] and [parents] went out and continued. The legacy of the Dubai 30x30 continues afterwards. [People] got back into exercise afterwards” (Classroom Teacher 4, School 3)

Promotion of the School

“...the assemblies and the guests coming in and the stair climbs...it’s just something different.

Yeah, and it’s a good way to promote the school” (PE Teacher 3, School 3)

“Across the whole school, just the optics were very good. Everywhere you looked, you could see posters on the walls. When you walked into reception, there is the cycle bike and there is the treadmill and everything. So, it’s everywhere you went you would just know. If someone came on holiday and they came to visit the school on their first day in Dubai, they’d probably ask ‘What is this 30/30?’” (PE Teacher 2, School 3)

“We have more parental involvement, we have more activities for the children on a daily basis...running through the school with posters on our interactive screens” (Principal, School 3)

471

472

---

## Discussion

473

Consistent with global trends in PA among school-age youth (Guthold et al., 2020),

474

most children and adolescents in the UAE are insufficiently active (Alrahma et al., 2023).

475

The current study drew upon conceptions of whole-of-school PA promotion (CDC, 2019;

476

IOM, 2013; Milton et al., 2021) to examine schools’ participation in Dubai 30x30. To our

477

knowledge, this is the first study to provide descriptive data about implementation and

478

outcomes related to schools’ involvement with Dubai 30x30. We therefore adopted an

479

exploratory approach, driven by several research questions intended to provide an initial



480 glimpse into various aspects of whole-of-school PA. Specifically, this study investigated the  
481 scope and nature of Dubai 30x30 activities offered before, during and after school and on  
482 weekends; students' participation in Dubai 30x30 activities; the role of school contextual  
483 variables in students' PA during Dubai 30x30; staff involvement in promoting Dubai 30x30;  
484 staff's perceptions of implementation successes and challenges; and staff's and students'  
485 perceptions of the impact of Dubai 30x30. The results of this study contribute to the growing  
486 knowledge base internationally on whole-of-school PA approaches, point to potential  
487 directions for future research and establish preliminary evidence that can be used to optimize  
488 Dubai 30x30 as a lever for increasing and sustaining whole-of-school PA in Dubai schools.

#### 489 **Research Question 1: Dubai 30x30 Activities Provided**

490 School staff reported that most Dubai 30x30 activities were provided in physical  
491 education, during school break times and before and after school. This suggests that Dubai  
492 30x30 activities spanned many of the contexts identified in whole-of-school PA  
493 recommendations (CDC, 2019; IOM, 2013; Milton et al., 2021). Internationally, there are  
494 inconsistencies in the degree to which schools provide PA through all possible recommended  
495 components/practices of a whole-of-school approach (American Alliance for Health, Physical  
496 Education, Recreation and Dance, 2011; Brenner et al., 2017; Colabianchi, et al., 2015;  
497 WHO, 2022). For example, in a national study of U.S. secondary schools, 7% of middle  
498 school students and less than 1% of high school students reported attending schools that  
499 offered all six practices conceptualized as a whole-of-school approach (having physical  
500 education; offering PA breaks during the school day; having intramural sports; having  
501 interscholastic sports; having active transportation opportunities to/from school; and having  
502 shared-use of school facilities agreements with outside entities; (Colabianchi et al., 2015).  
503 The results of a meta-analysis study indicated that increasing the number of components  
504 through which school-based PA programming is provided is positively associated with an

505 increase in students' total daily PA minutes (Russ et al., 2015). However, Webster et al.  
506 (2020) assert that school-based PA programming should be viewed as sufficient based on  
507 whether all students achieve the goals of the program, as opposed to whether the program  
508 consists of a certain number of components or practices. Future research on schools'  
509 implementation of Dubai 30x30 should further investigate both the quantity and quality of  
510 PA offerings and the association of such offerings with targeted student outcomes (e.g.,  
511 meeting PA guidelines, meeting academic standards).

## 512 **Research Question 2: Students' Participation in Dubai 30x30 Activities**

513 Students reported that they mainly participated in Dubai 30x30 activities during  
514 physical education and occasionally participated in activities after school and on weekends  
515 but infrequently participated in activities offered during break times. Comparing these data to  
516 the results for the first research question, it seems that providing opportunities for PA during  
517 break times may not always lead to students participating in such opportunities. This might  
518 have to do with students' motivation. Lonsdale et al. (2009) found that adolescents in Hong  
519 Kong who were more self-determined in their motivation to participate in physical education  
520 had higher PA levels during a free-choice period compared to students who were less self-  
521 determined in their motivation. Therefore, a possible direction for future research on schools'  
522 participation in Dubai 30x30 is to examine the relationship between students' motivation and  
523 their participation in Dubai 30x30 activities. Additionally, the qualities or characteristics of  
524 Dubai 30x30 activities that students find most appealing, and which serve as sources of  
525 motivation to participate warrant increased attention in future studies. The present study  
526 revealed that students were drawn to competitive activities. Other whole-of-school research  
527 also highlighted competition as a key driver for students' involvement in PA opportunities,  
528 although recognition of participation and effort was also important for fostering involvement  
529 (Ní Chróinín et al. 2020). In another study, some adolescents' PA levels were highest when

530 non-competitive physical activities were provided as part of a comprehensive approach to  
531 school health (Pirrie et al., 2022).

### 532 **Research Question 3: Relationship of Students' PA to School Contextual Variables**

533 During school, students were more likely to reach higher PA intensity levels when  
534 they were in locations, instructional settings, and activity contexts other than the regular  
535 classroom setting, core class time and academic activities. These findings reinforce the data  
536 addressing the first two research questions in that the participating schools appeared to place  
537 a limited focus on Dubai 30x30 as a catalyst or incubator for increasing PA during regular  
538 classroom time. Providing PA opportunities during periods of the day devoted to academic  
539 instruction (outside of physical education) – a practice referred to as movement integration  
540 (Webster et al., 2015) – is recommended as part of a whole-of-school PA approach (CDC,  
541 2019; IOM, 2013; Milton et al., 2021). The current literature on movement integration mostly  
542 centers on primary/elementary school settings. In such contexts, movement integration in can  
543 involve various strategies, such as infusing PA into academic lessons or giving students brief  
544 breaks from sitting (Moon & Webster, 2019). Previous research shows that integrating PA  
545 during regular classroom time increases children's PA participation and educational  
546 outcomes (Norris et al., 2020). However, classroom teachers often report barriers to using  
547 movement integration (e.g., lack of time, lack of resources, lack of support from school  
548 administrators; Michael et al., 2019; Schmidt et al., 2022). It would be interesting in future  
549 research to further explore the potential of using regular classroom time during Dubai 30x30  
550 to increase children and adolescents' school-based PA.

### 551 **Research Question 4: Involvement/Engagement of Staff, Families and Community**

#### 552 **Partners in Dubai 30x30**

553 Among school staff, physical education teachers were most involved and classroom  
554 teachers were least involved in promoting Dubai 30x30, which resonates with the results for

555 the first three research questions. Whole-of-school PA recommendations commonly call upon  
556 physical education teachers to serve as leaders in providing PA opportunities and galvanizing  
557 the support of other school staff, parents, and community partners (Beighle et al., 2009;  
558 Carson et al., 2014; McKenzie & Lounsbery, 2013). Yet, Webster et al. (2015) note that in  
559 many cases, certain obstacles may need to be overcome for physical education teachers to  
560 effectively lead whole-of-school PA initiatives. Such obstacles include a lack of professional  
561 preparation and training specific to whole-of-school PA leadership and a lack of incentives  
562 for physical education teachers to take on leadership responsibilities (e.g., personal interest,  
563 tangible rewards, external accountability). The findings in the present study seem to suggest  
564 that physical education teachers were successful in garnering involvement from parents and  
565 engaging numerous community partners. Principals also provided support for schools’  
566 participation in Dubai 30x30. Thus, a priority for future implementations of the initiative will  
567 be to increase attention to helping physical education teachers build enhanced support from  
568 classroom teachers.

#### 569 **Research Question 5: Staff’s Perceived Implementation Successes and Challenges**

570 Staff perceived that Dubai 30x30 brought their school communities together. This is a  
571 fundamental goal of whole-of-school PA approaches, which are intended to draw upon the  
572 collaboration and synergy of school staff, families, and communities (CDC, 2019; IOM,  
573 2013; Milton et al., 2021). However, physical education teachers also commented on the lack  
574 of guidance concerning implementation and they felt burdened by the amount of work  
575 involved and pressure to make Dubai 30x30 a special month for their schools. Unfortunately,  
576 we neglected to more fully explore the source of the pressure physical education teachers felt  
577 in relation to implementing Dubai 30x30 activities. In previous research, factors at multiple  
578 social-ecological levels exerted an influence (e.g., public policy, administrative support,  
579 teacher beliefs) on whole-of-school PA practices (Cassar et al., 2022; Phelps et al., 2018). In

580 the case of Dubai 30x30, which the Dubai government initiated and strongly promotes, it is  
581 possible that the pressure physical education teachers feel may stem from the government,  
582 but it is also possible that other factors, such as the overall school ethos, principals' priorities,  
583 parents' interest, or physical education teachers' own personal values contribute to these  
584 feelings of pressure.

585 Although principals noted that time was a barrier to implementation, neither they nor  
586 the classroom teachers communicated feelings of being overwhelmed, in contrast to what was  
587 evidenced in the focus groups and interview with physical education teachers. A more  
588 balanced diffusion of responsibility across all school stakeholders should be sought in future  
589 school-based implementations of the Dubai 30x30. For instance, consistent with  
590 recommendations for implementing whole-of-school PA programming (e.g., CDC, 2013),  
591 schools could form a school wide Dubai 30x30 committee to promote distributed leadership,  
592 shared decision-making, and clear guidance with respect to the initiative. Such a committee  
593 could a designated Dubai 30x30 "champion" (e.g., a physical education teacher), classroom  
594 teacher representatives, a school administrator, parent representatives, student representatives  
595 and community partner representatives.

596 **Research Question 6: Perceived Impact of Schools' Implementation of Dubai 30x30**

597 Participants believed Dubai 30x30 increased PA participation and helped to promote  
598 their schools. The value of these beliefs in energizing school staff and sustaining their  
599 involvement in the initiative is an important area of focus for future research. A study of  
600 school principals in the U.S. found that participants' outcome expectations directly predicted  
601 their level of self-reported involvement in CSPAPs (Orendorff et al., 2020). Specifically,  
602 principals were more likely to be involved if they believed a CSPAP would benefit students  
603 not just in terms of their PA participation but also in terms of their physical development,  
604 cognitive development, social development, school attendance and academic performance.

605 Participants in the present study made little reference to most of these outcomes when  
606 discussing the impact of Dubai 30x30. In the future, researchers should more systematically  
607 measure a broad range of student outcomes associated with schools' participation in Dubai  
608 30x30, as such data may spur staff's involvement.

### 609 **Limitations**

610 This study had several limitations. First, although working with only a few schools  
611 allowed us to explore school-based Dubai 30x30 implementation from multiple perspectives,  
612 the use of a small convenience sample limits the generalizability of the results. Second, we  
613 sought to survey parents in this study, but no parents participated. Understanding the  
614 perspectives of parents and community partners is critical to advancing research and practice  
615 related to schools' implementation of Dubai 30x30. Third, this study merely provides a  
616 snapshot of schools' participation in the initiative. Future studies should employ multi-year  
617 data collection protocols to examine participation patterns and investigate factors that may be  
618 associated with variation in implementation rates and strategies. Furthermore, studies  
619 adopting experimental designs will be useful in determining cause-effect relationships  
620 between implementation practices and outcomes.

### 621 **Conclusions**

622 This study provides an initial glimpse into schools' implementation of Dubai 30x30  
623 from a whole-of-school PA perspective. In line with recommended practices (CDC, 2019;  
624 IOM, 2013; Milton et al., 2021), physical education served as a central component in the  
625 promotion of PA within the participating schools and physical education teachers played  
626 leading roles in organizing and implementing Dubai 30x30 activities. While implementation  
627 resulted in several positive outcomes, physical education teachers bore the brunt of  
628 responsibility for schools' participation in the initiative and a gap in PA promotion was  
629 evident during regular classroom time. Further research is needed to determine whether these

## WHOLE-OF-SCHOOL PHYSICAL ACTIVITY

630 results generalize to other schools in Dubai, and if so, how to optimally support  
631 collaborations between physical education teachers and other school stakeholders to harness  
632 Dubai 30x30 for whole-of-school PA.

### 633 **Acknowledgements**

634 The authors wish to acknowledge the support of the principals, teachers and students  
635 who agreed to participate in this study.

### 636 **Conflict of Interest**

637 The authors declare that the research was conducted in the absence of any commercial  
638 or financial relationships that could be construed as a potential conflict of interest.

### 639 **Author Contributions**

640 CM and CAW conceived and designed the study. CAW, CEH, GT, ZMI, SZFN, MG,  
641 SK, MK, TK, PP and YS collected data for the study. CM and CAW organized the database.  
642 RGW performed the quantitative data analysis. CM and CAW performed the qualitative  
643 analysis. CM, CAW and RGW wrote the first draft of the manuscript. All authors contributed  
644 to manuscript revision, read, and approved the submitted version.

645

646

647

648

649

650

651

652

653

654

655 **References**

- 656 Alrahma, A. M., Al Suwaidi, H., AlGurg, R., Farah, Z., Khansaheb, H., Ajja, R., ... Loney,  
657 T. (2023). Results from the United Arab Emirates 2022 report card on physical activity for  
658 children and adolescents. *Journal of Exercise Science and Fitness*, 21(2), 218-225.  
659 <https://doi.org/10.1016/j.jesf.2023.02.002>
- 660 American Alliance for Health, Physical Education, Recreation and Dance. (2011).  
661 *Comprehensive School Physical Activity Program (CSPAP) survey report*. Reston, VA:  
662 Author.
- 663 Beighle, A., Erwin, H., Castelli, D., & Ernst, M. (2009). Preparing physical educators for the  
664 role of physical activity director. *Journal of Physical Education, Recreation and Dance*,  
665 80(4), 24-29. <https://doi.org/10.1080/07303084.2009.10598307>
- 666 Belton, S., Britton, Ú., Murtagh, E., Meegan, S., Duff, C., & McGann, J. (2020). Ten years of  
667 “Flying the Flag”: An overview and retrospective consideration of the Active School Flag  
668 physical activity initiative for children – design, development and evaluation. *Children*,  
669 7(12), 300. <https://doi.org/10.3390/children7120300>
- 670 Brener, N. D., Demissie, Z., McManus, T., Shanklin, S. L., Queen, B. and Kann, L. (2017).  
671 *School Health Profiles 2016: Characteristics of health programs among secondary schools*.  
672 Atlanta, GA: Centers for Disease Control and Prevention.
- 673 Bronfenbrenner, U. (1992). Ecological systems theory. In R. Vasta (Ed.), *Six Theories of*  
674 *Child Development: Revised formulations and current issues* (pp. 187-249). London: Jessica  
675 Kingsley Publishers.
- 676 Carson, R. L., Castelli, D. M., Beighle, A., & Erwin, H. (2014). School-based physical  
677 activity promotion: A conceptual framework for research and practice. *Childhood Obesity*,  
678 10(2), 100-106. <https://doi.org/10.1089/chi.2013.0134>



## WHOLE-OF-SCHOOL PHYSICAL ACTIVITY

- 679 Cassar, S., Salmon, J., Timperio, A., Koch, S., & Koorts, H. (2020). A qualitative study of  
680 school leader experiences adopting and implementing a whole of school physical activity and  
681 sedentary behavior programme: Transform Us! *Health Education, 122*(3), 267-285.  
682 <https://doi.org/10.1108/HE-05-2020-0031>
- 683 Centers for Disease Control and Prevention. (2013). Comprehensive school physical activity  
684 programs: A guide for schools. Atlanta, GA: U.S. Department of Health and Human Services.
- 685 Centers for Disease Control and Prevention. (2019). Increasing physical education and  
686 physical activity: A framework for schools. Atlanta, GA: U.S. Department of Health and  
687 Human Services.
- 688 Chaput, J. P., Willumsen, J., Bull, F., Chou, R., Ekelund, U., Firth, J., Jago, R., Ortega, F. B.,  
689 & Katzmarzyk, P. T. (2020). 2020 WHO guidelines on physical activity and sedentary  
690 behaviour for children and adolescents aged 5-17 years: summary of the evidence. *The*  
691 *International Journal of Behavioral Nutrition and Physical Activity, 17*(1), 141.  
692 <https://doi.org/10.1186/s12966-020-01037-z>
- 693 Colabianchi, N., Griffin, J. L., Slater, S. J., O'Malley, P. M., & Johnston, L. D. (2015). The  
694 Whole-of-school approach to physical activity: Findings from a national sample of U.S.  
695 secondary students. *American Journal of Preventive Medicine, 49*(3), 387-394.  
696 <https://doi.org/10.1016/j.amepre.2015.02.012>
- 697 Edmonds, A. W., & Kennedy, T. D. (2017). *An applied guide to research designs: Quantitative, qualitative and mixed methods*. Los Angeles: SAGE Publications.
- 698 Global Advocacy for Physical Activity. (2011). Non-communicable disease prevention –  
700 investments that work for physical activity. *International Society for Physical Activity and*  
701 *Health*. Available from <http://www.globalpa.org.uk/pdf/investments-work.pdf>
- 702 Guthold, R., Stevens, G. A., Riley, L. M., & Bull, F. C. (2020). Global trends in insufficient  
703 physical activity among adolescents: A pooled analysis of 298 population-based surveys with

## WHOLE-OF-SCHOOL PHYSICAL ACTIVITY

- 704 1.6 million participants. *The Lancet. Child & Adolescent Health*, 4(1), 23–35.
- 705 [https://doi.org/10.1016/S2352-4642\(19\)30323-2](https://doi.org/10.1016/S2352-4642(19)30323-2)
- 706 Hayes, G., Dowd, K. P., MacDonncha, C., & Donnelly, A. E. (2019). Tracking of physical  
707 activity and sedentary behavior from adolescence to young adulthood: A systematic literature  
708 review. *The Journal of Adolescent Health*, 65(4), 446–454.
- 709 <https://doi.org/10.1016/j.jadohealth.2019.03.013>
- 710 Schools get moving in the Dubai Fitness Challenge. (2022, December 1). *Gulf Youth Sport*.  
711 <https://gulfyouthsport.com/2022/12/01/schools-get-moving-in-the-dubai-fitness-challenge/>
- 712 Roberts, S. (2022, November 18). UAE schools embrace Dubai Fitness Challenge. *Which*  
713 *School Advisor*. [https://whichschooladvisor.com/uae/school-news/uae-schools-embrace-](https://whichschooladvisor.com/uae/school-news/uae-schools-embrace-dubai-fitness-challenge-30x30)  
714 [dubai-fitness-challenge-30x30](https://whichschooladvisor.com/uae/school-news/uae-schools-embrace-dubai-fitness-challenge-30x30)
- 715 [Dubai Fitness Challenge: 88% participants hit 30-minute daily target last year. \(2022, March](https://www.khaleejtimes.com/life-and-living/dubai-fitness-challenge-88-participants-hit-30-minute-daily-target-last-year#:~:text=The%20DFC%20has%20grown%20phenomenally,people%20take%20part%20in%202021)  
716 [13\). \*Khaleej Times\*. \[https://www.khaleejtimes.com/life-and-living/dubai-fitness-challenge-\]\(https://www.khaleejtimes.com/life-and-living/dubai-fitness-challenge-88-participants-hit-30-minute-daily-target-last-year#:~:text=The%20DFC%20has%20grown%20phenomenally,people%20take%20part%20in%202021\)  
717 \[88-participants-hit-30-minute-daily-target-last-\]\(https://www.khaleejtimes.com/life-and-living/dubai-fitness-challenge-88-participants-hit-30-minute-daily-target-last-year#:~:text=The%20DFC%20has%20grown%20phenomenally,people%20take%20part%20in%202021\)  
718 \[year#:~:text=The%20DFC%20has%20grown%20phenomenally,people%20take%20part%20\]\(https://www.khaleejtimes.com/life-and-living/dubai-fitness-challenge-88-participants-hit-30-minute-daily-target-last-year#:~:text=The%20DFC%20has%20grown%20phenomenally,people%20take%20part%20in%202021\)  
719 \[in%202021\]\(https://www.khaleejtimes.com/life-and-living/dubai-fitness-challenge-88-participants-hit-30-minute-daily-target-last-year#:~:text=The%20DFC%20has%20grown%20phenomenally,people%20take%20part%20in%202021\)](https://www.khaleejtimes.com/life-and-living/dubai-fitness-challenge-88-participants-hit-30-minute-daily-target-last-year#:~:text=The%20DFC%20has%20grown%20phenomenally,people%20take%20part%20in%202021)
- 720 Katewongsa, P., Choolers, P., Saonuan, P., Widyastari, D. A. (2022). Effectiveness of a  
721 whole-of-school approach in promoting physical activity for children: Evidence from cohort  
722 study in primary schools in Thailand. *Journal of Teaching in Physical Education*, 4(2), 225-  
723 234. <https://doi.org/10.1123/jtpe.2021-0186>
- 724 Krueger, R. A., & Casey, M.A. (2014). *Focus groups: A practical guide for applied research*.  
725 New Delhi: Sage Publications.
- 726 Lincoln, Y., & Guba, E. G. (1985). *Naturalistic inquiry*. Newbury Park, CA: Sage.
- 727 Lonsdale, C., Sabiston, C. M., Raedeke, T. D., Ha, A. S., & Sum, R. K. (2009). Self-  
728 determined motivation and students' physical activity during structured physical education

## WHOLE-OF-SCHOOL PHYSICAL ACTIVITY

- 729 lessons and free choice periods. *Preventive Medicine*, 48(1), 69–73.
- 730 <https://doi.org/10.1016/j.ypmed.2008.09.013>
- 731 McIver, K. L., Brown, W. H., Pfeiffer, K. A., Dowda, M., & Pate, R. R. (2016). Development  
732 and testing of the Observational System for Recording Physical Activity in Children:  
733 Elementary School. *Research Quarterly for Exercise and Sport*, 87(1), 101-109.
- 734 <https://doi.org/10.1080/02701367.2015.1125994>
- 735 McKenzie, T. L., & Lounsbery, M. A. (2013). Physical education teacher effectiveness in a  
736 public health context. *Research Quarterly for Exercise and Sport*, 84(4), 419-430.
- 737 <https://doi.org/10.1080/02701367.2013.844025>
- 738 McLeroy, K. R., Bibeau, D., Steckler, A., & Glanz, K. (1988). An ecological perspective on  
739 health promotion programs. *Health Education Quarterly*, 15(4), 351-377.
- 740 <https://doi.org/10.1177/109019818801500401>
- 741 Milton, K., Cavill, N., Chalkley, A., Foster, C., Gomersall, S., Hagstromer, M., ...  
742 Schipperijn, J. (2021). Eight investments that work for physical activity. *Journal of Physical  
743 Activity & Health*, 18(6), 625-630. <https://doi.org/10.1123/jpah.2021-0112>
- 744 McMullen, J. M., Kallio, J., & Tammelin, T. H. (2022) Physical activity opportunities for  
745 secondary school students: International best practices for whole-of-school physical activity  
746 programs. *European Physical Education Review*, 28(4), 890-905.
- 747 <https://doi.org/10.1177/1356336X221092281>
- 748 Moon, J., & Webster, C. A. (2019). MI (my) wheelhouse: A movement integration  
749 progression framework for elementary classroom teachers. *Journal of Physical Education,  
750 Recreation and Dance*, 90(7), 38-45. <https://doi.org/10.1080/07303084.2019.1644258>
- 751 Ní Chróinín, D., & McMullen, J. (2019) “The world is a happier place”: Celebration in a  
752 whole-of-school physical activity initiative. *European Physical Education Review*, 26(2),  
753 337-352. <https://doi.org/10.1177/1356336X19858115>

## WHOLE-OF-SCHOOL PHYSICAL ACTIVITY

- 754 Norris, E., van Steen, T., Direito, A., & Stamatakis, E. (2020). Physically active lessons in  
755 schools and their impact on physical activity, educational, health and cognition outcomes: a  
756 systematic review and meta-analysis. *British Journal of Sports Medicine*, 54(14), 826-838.  
757 <https://doi.org/10.1136/bjsports-2018-100502>
- 758 Orendorff, K., Webster, C. A., Mîndrila, D., Cunningham, K. M., Doutis, P., Dauenhauer, B.,  
759 & Stodden, D. F. (2021). Principals' involvement in comprehensive school physical activity  
760 programs: A social-ecological perspective. *European Physical Education Review*, 27(3),  
761 574-594. <https://doi.org/10.1177/1356336X20976687>
- 762 Phelps, A., Calvert, H. G., Hwang, J., Glowacki, E., Carson, R. L., & Castelli, D. (2018).  
763 Environmental characteristics related to comprehensive school physical activity program  
764 implementation. *European Journal of Environment and Public Health*, 2(2), 07.  
765 <https://doi.org/10.20897/ejeph/92007>
- 766 Pirrie, M., Carson, V., Dubin, J. A., & Leatherdale, S. T. (2022). A comprehensive school  
767 health approach to student physical activity: A multilevel analysis examining the association  
768 between school-level factors and student physical activity behaviors. *The Journal of School*  
769 *Health*, 92(8), 774-785. <https://doi.org/10.1111/josh.13178>
- 770 Pulling Kuhn, A., Stoepler, P., Dauenhauer, B., & Carson, R. L. (2021). A systematic review  
771 of multi-component comprehensive school physical activity program (CSPAP) interventions.  
772 *American Journal of Health Promotion*, 35(8), 1129–1149.  
773 <https://doi.org/10.1177/08901171211013281>
- 774 Russ, L. B., Webster, C. A., Beets, M. W., & Phillips, D. S. (2015). Systematic review and  
775 meta-analysis of multi-component interventions through schools to increase physical activity.  
776 *Journal of Physical Activity & Health*, 12(10), 1436-1446. <https://doi.org/10.1123/jpah.2014-0244>  
777 [0244](https://doi.org/10.1123/jpah.2014-0244)

## WHOLE-OF-SCHOOL PHYSICAL ACTIVITY

- 778 Schmidt, S. K., Bratland-Sanda, S. & Bongaardt, R. (2022). Secondary school teachers'  
779 experiences with classroom-based physically active learning: “I'm excited, but it's really  
780 hard”. *Teaching and Teacher Education*, 116, 103753.  
781 <https://doi.org/10.1016/j.tate.2022.103753>
- 782 Stoepker, P., Dauenhauer, B., Carson, R. L., & Moore, J. B. (2021). Comprehensive School  
783 Physical Activity Program Policies and Practices Questionnaire (CSPAP-Q). *Research*  
784 *Quarterly for Exercise and Sport*, 92(1), 100-110.  
785 <https://doi.org/10.1080/02701367.2019.1711008>
- 786 Strauss, A., & Corbin, J. M. (1990). *Basics of qualitative research: Grounded theory*  
787 *procedures and techniques*. Thousand Oaks, CA: Sage Publications.
- 788 Telama R. (2009). Tracking of physical activity from childhood to adulthood: A  
789 review. *Obesity Facts*, 2(3), 187–195. <https://doi.org/10.1159/000222244>
- 790 van der Mars, H. (1989) *Observer reliability: Issues and procedures*. In P. Darst., D.  
791 Zakrajsek. and V. Mancini (Eds.), *Analyzing Physical Education and Sport Instruction* (2nd  
792 ed., pp. 53–80). Human Kinetics, Champaign.
- 793 Webster, C. A., Beets, M., Weaver, R. G., Vazou, S., & Russ, L. (2015). Rethinking  
794 recommendations for implementing comprehensive school physical activity programs: A  
795 partnership model. *Quest*, 67, 185-202. <https://doi.org/10.1080/00336297.2015.1017588>
- 796 Webster, C.A., Caputi, P., Perreault, M., Doan, R., Douthis, P. and Weaver, R.G. (2013)  
797 ‘Elementary classroom teachers’ adoption of physical activity promotion in the context of a  
798 statewide policy: An innovation diffusion and socio-ecologic perspective. *Journal of*  
799 *Teaching in Physical Education*, 32(4), 419-440. <https://doi.org/10.1123/jtpe.32.4.419>
- 800 Webster, C. A., Rink, J. E., Carson, R. L., Moon, J., & Gaudreault, K. L. (2020). The  
801 comprehensive school physical activity program model: A proposed illustrative supplement

## WHOLE-OF-SCHOOL PHYSICAL ACTIVITY

802 to help move the needle on youth physical activity. *Kinesiology Review*, 9(2), 112-121.

803 <https://doi.org/10.1123/kr.2019-0048>

804 World Health Organization. (2022). Promoting physical activity through schools: Policy

805 brief. Available from

806 <https://apps.who.int/iris/bitstream/handle/10665/354605/9789240049567->

807 [eng.pdf?sequence=1](https://apps.who.int/iris/bitstream/handle/10665/354605/9789240049567-eng.pdf?sequence=1)
